# Supplementary material for: Development of Korean Indigenous Low-Temperature-Tolerant Yeast for Enhancing the Flavor of Yakju
Source: MDPI journal article supplement (doi:10.3390/fermentation7040260), 2021-11-09
Supplement: s1 [file s1]

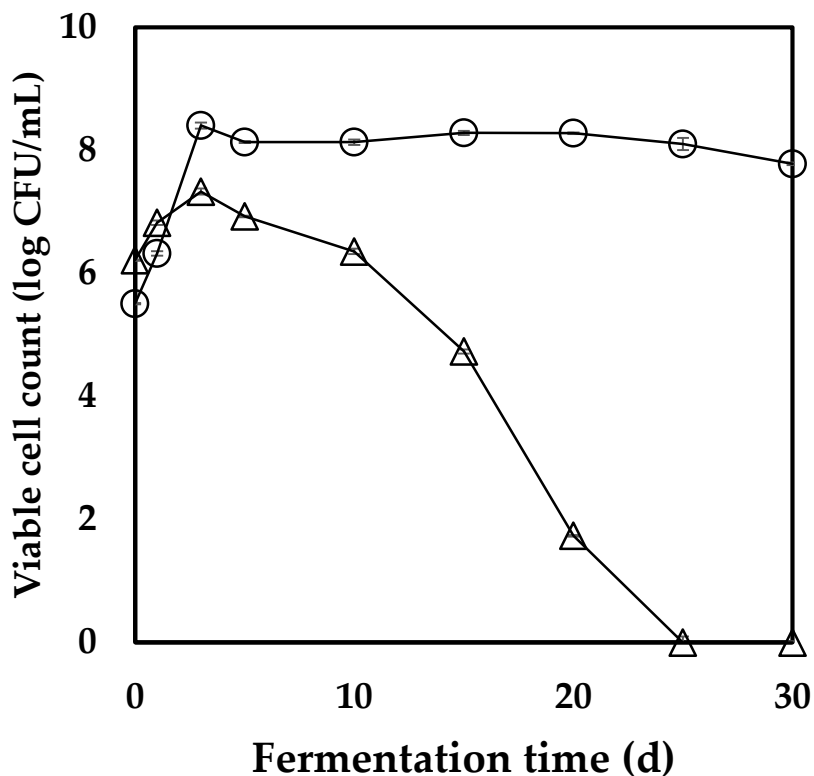

(a)

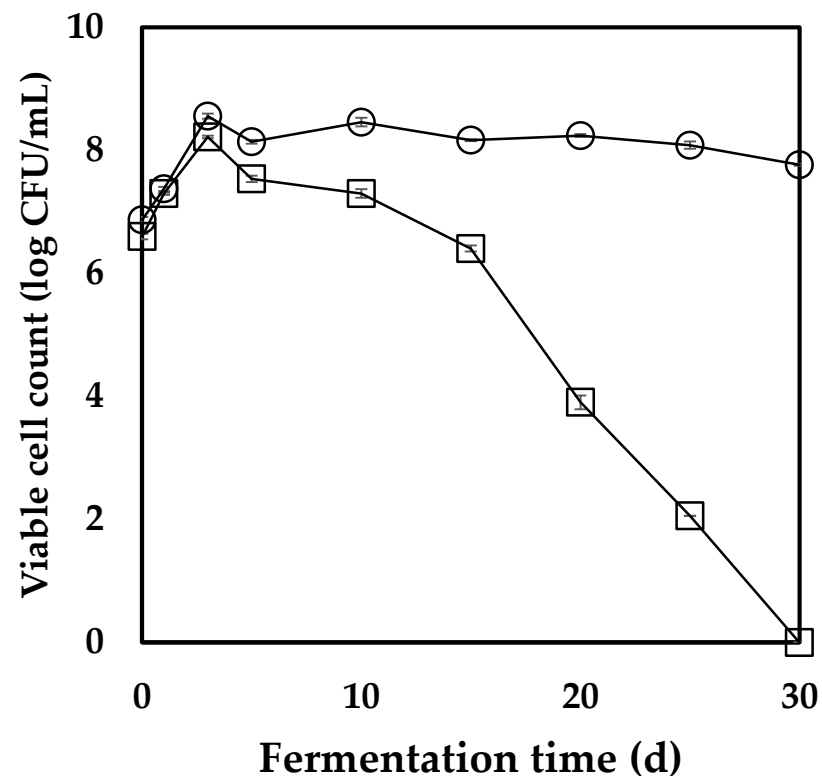

(b)

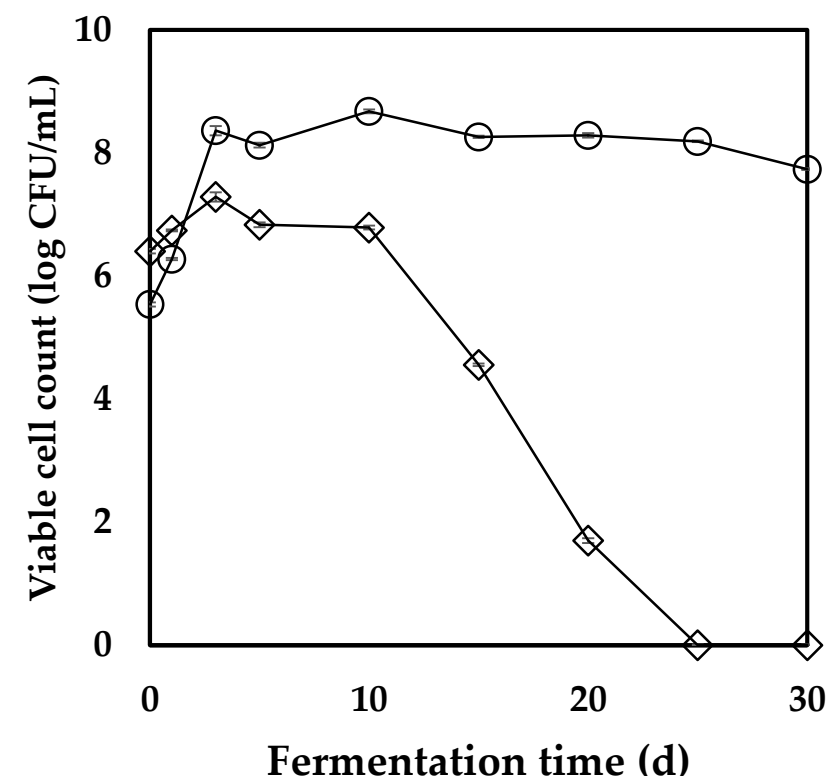

(c)

**Figure S1. Viable cell number of co-culture strain used in *yakju* fermentation.**

Result were shown at log CFU/ml value of co-culture of *S. cerevisiae* W153 with *P. kudriavzevii* N373 (a), *H. vineae* G818 (b), and *W. anomalus* A159.

○, *S. cerevisiae* W-3; △, *P. kudriavzevii* N373; □, *H. vineae* G818; ◇, *W. anomalus* A159

All the data were expressed as mean±SD (n=3).
